# Supplementary material
Source: PubMed Central journal article supplement (PMC4688143)
Supplement: NIHMS743943-supplement-supplemental_files.pdf [file NIHMS743943-supplement-supplemental_files.pdf]

Figure S1

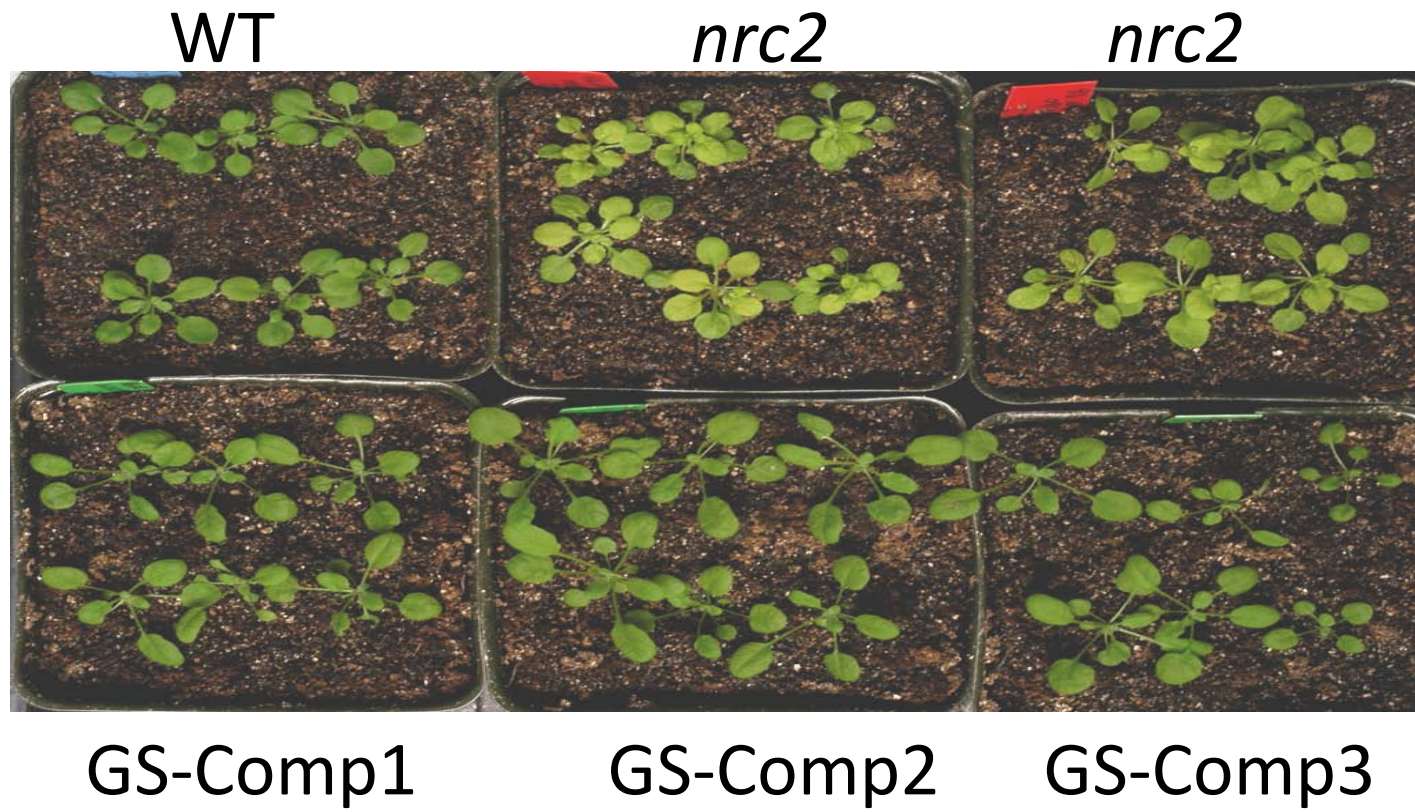

Table S1

| Cadmium Control Fold Induction Locus |        |      |                  | Description                                      |
|--------------------------------------|--------|------|------------------|--------------------------------------------------|
| 1294.5                               | 34.1   | 38.0 | At2g44460        | putative beta-glucosidase                        |
| 881.1                                | 34.3   | 25.7 | At3g49580        | putative protein                                 |
| 733.5                                | 30     | 24.5 | At5g48850        | MALE STERILITY MS5 FAMILY PROTEIN                |
| 4999.3                               | 566.4  | 8.8  | <b>At1g78000</b> | high affinity sulphate transporter, putative     |
| 963                                  | 137.6  | 7.0  | <b>At1g69920</b> | glutathione transferase, putative                |
| 214.3                                | 31.7   | 6.8  | At1g23730        | putative carbonic anhydrase                      |
| 281.5                                | 41.8   | 6.7  | At3g45460        | putative protein                                 |
| 2461.7                               | 374.7  | 6.6  | <b>At1g17170</b> | glutathione transferase, putative                |
| 232.7                                | 35.7   | 6.5  | At4g17710        | GLABRA2 like protein                             |
| 1494.4                               | 277.4  | 5.4  | At2g23270        | hypothetical protein                             |
| 494.4                                | 93     | 5.3  | <b>At1g74310</b> | heat shock protein 101 (HSP101)                  |
| 3968.7                               | 756.1  | 5.2  | <b>At4g04610</b> | 5-adenylylsulfate reductase                      |
| 271.2                                | 55.7   | 4.9  | At1g10980        | membrane protein PTM1 precursor isolog           |
| 561                                  | 121    | 4.6  | At5g26220        | CHAC-LIKE FAMILY PROTEIN                         |
| 821                                  | 192.1  | 4.3  | At4g23600        | tyrosine transaminase like protein               |
| 4766.1                               | 1132.5 | 4.2  | At4g04830        | Similar to METHIONINE SULFOXIDE REDUCTASE        |
| 287.2                                | 68.9   | 4.2  | At3g16330        | unknown protein                                  |
| 1058.7                               | 259.3  | 4.1  | At1g21140        | tonoplast intrinsic protein, alpha (alpha-TIP)   |
| 5125.7                               | 1270.5 | 4.0  | <b>At4g21990</b> | 5-adenylylsulfate reductase                      |
| 1944.3                               | 501.6  | 3.9  | <b>At3g12580</b> | heat shock protein 70                            |
| 253.2                                | 65.8   | 3.8  | At1g65390        | disease resistance protein (TIR class), putative |
| 613.4                                | 159.6  | 3.8  | At4g33040        | GLUTAREDOXIN FAMILY PROTEIN                      |
| 3730.1                               | 979.1  | 3.8  | <b>At1g62180</b> | 5-adenylylsulfate reductase                      |
| 2312.7                               | 610.7  | 3.8  | At3g25190        | integral membrane protein, putative              |
| 868.4                                | 233.9  | 3.7  | At2g37430        | putative C2H2-type zinc finger protein           |
| 388.4                                | 104.8  | 3.7  | At2g18210        | unknown protein                                  |
| 2537.7                               | 688.9  | 3.7  | At1g78340        | glutathione transferase, putative                |
| 1790.7                               | 494.4  | 3.6  | <b>At3g45140</b> | lipoxygenase AtLOX2                              |
| 488.1                                | 135.1  | 3.6  | At3g28220        | Similar to UBIQUITIN-SPECIFIC PROTEASE 12        |
| 554                                  | 154.2  | 3.6  | At2g02010_s      | glutamate decarboxylase                          |

Table S2

| Primer Name | Sequence (5' - 3')                  | AGI       | Purpose                                           |
|-------------|-------------------------------------|-----------|---------------------------------------------------|
| DS451       | TCTGCAATAGCACACTCCAGCTT             | AHg23100  | sequencing primer (CAD2 $\gamma$ -ECS)            |
| DS452       | GTGAATGGTAGATAATGAATCACCA           | AHg23100  | sequencing primer (CAD2 $\gamma$ -ECS)            |
| DS453       | CATGGAATTTGAAGGATTTTGTGA            | AHg23100  | sequencing primer (CAD2 $\gamma$ -ECS)            |
| DS454       | AGAAACAATCAAAATTCGTGTATCA           | AHg23100  | sequencing primer (CAD2 $\gamma$ -ECS)            |
| DS455       | CTCTTCTTCTTCGCTTTCGTGA              | AHg23100  | sequencing primer (CAD2 $\gamma$ -ECS)            |
| DS456       | TGAAGCTAACATGTTTCTACAGGCT           | AHg23100  | sequencing primer (CAD2 $\gamma$ -ECS)            |
| DS457       | CGAGCTTCTTAATGGTATCGCT              | AHg23100  | sequencing primer (CAD2 $\gamma$ -ECS)            |
| DS458       | C GTTGGCTATGTAGAATCAGA              | AHg23100  | sequencing primer (CAD2 $\gamma$ -ECS)            |
| DS459       | GCATGTCGCTGAAGATGTCTCT              | AHg23100  | sequencing primer (CAD2 $\gamma$ -ECS)            |
| DS460       | AACTTCCACTACACAGCCTAGA              | AHg23100  | sequencing primer (CAD2 $\gamma$ -ECS)            |
| DS566       | GTATTATGAGCCAAAGTGATTGT             | A5g27380  | sequencing primer (GS)                            |
| DS567       | GAACATTTCTGATTTCTGTGA               | A5g27380  | sequencing primer (GS)                            |
| DS568       | ATCACTGATCTTGATTTGTGTT              | A5g27380  | sequencing primer (GS)                            |
| DS569       | TATTTGAAACGGTCTTTCAGTA              | A5g27380  | sequencing primer (GS)                            |
| DS570       | TTTCAGACATTCGTTGATTCAT              | A5g27380  | sequencing primer (GS)                            |
| DS461-F     | GATGTGAATTGACTTCAGCACAA             | AHg23100  | $\gamma$ -ECS RT-PCR                              |
| DS600-R     | GAGGAGTAAAGAGGGCATCAA               | AHg23101  | $\gamma$ -ECS RT-PCR                              |
| DS462-F     | ATAAGCAGCCTAGCATTCCTAT              | A5g27380  | GS RT-PCR                                         |
| DS601-R     | GCATAGACTCTGAACGTGTACCTA            | A5g27380  | GS RT-PCR                                         |
| TJ198-F     | CACCATGGCAGTGGCTGCTCTCTCTCT         | A5g27380  | Cloning of GS                                     |
| TJ198-R     | TCAAATCAGATATATGCTGTCCAAAGACTCC     | A5g27381  | Cloning of GS                                     |
| TJ199-F     | CACCATGGCCTTGTCTCAAGCAGGAG          | AHg23100  | Cloning of $\gamma$ -ECS                          |
| TJ199-R     | TTAGTACAGCAGCTCTTCGAACACG           | AHg23100  | Cloning of $\gamma$ -ECS                          |
| RDS129      | CGCGATCCAGTGAAGCCAAATTTCTGAAGTTACA  | At1g74310 | Promoter cloning primers to pPZP $\times$ omegal+ |
| RDS130      | CGCGATCCCTTCGATGACTTTTGTAAATCCCTG   | At1g74310 | Promoter cloning primers to pPZP $\times$ omegal+ |
| RDS131      | CGCGATCCAAAGGCGTGTAAATACATTGCAAT    | AHg21990  | Promoter cloning primers to pPZP $\times$ omegal+ |
| RDS132      | CGCGATCCCTTCACTCCAAACCAAATCTCTC     | AHg21990  | Promoter cloning primers to pPZP $\times$ omegal+ |
| RDS133      | CGCGATCCCGCTTGTGATGTTCTTGCTTAGT     | At1g78000 | Promoter cloning primers to pPZP $\times$ omegal+ |
| RDS134      | CGCGATCCAGTATGTAACCTCTGCAAAACAGAACA | At1g78000 | Promoter cloning primers to pPZP $\times$ omegal+ |
| RDS135      | CGCGATCCAAACGGAAATCGACCAATAAGTATAA  | AHg04610  | Promoter cloning primers to pPZP $\times$ omegal+ |
| RDS136      | CGCGATCCCTTTCACAGCAAAATTTGGATT      | AHg04610  | Promoter cloning primers to pPZP $\times$ omegal+ |
| RDS137      | CGCGATCCAGCGGATATATACAGTTTCTTTTCAT  | At1g62180 | Promoter cloning primers to pPZP $\times$ omegal+ |
| RDS138      | CGCGATCCCTTCAATCAAAAAAAGGATGCTC     | At1g62180 | Promoter cloning primers to pPZP $\times$ omegal+ |
| RDS141      | CGCGATCCCTGGAATGCTTATGATGTTTGCTAC   | A5g45140  | Promoter cloning primers to pPZP $\times$ omegal+ |
| RDS142      | GCCCAAGCTTATTTTTCTCTTCTATAAGGCTTACA | A5g45140  | Promoter cloning primers to pPZP $\times$ omegal+ |
| RDS143      | GCCCAAGCTTTTAGAGGATGTTGTGTAGAG      | A5g12580  | Promoter cloning primers to pPZP $\times$ omegal+ |
| RDS144      | GCCCAAGCTTTTATTAGAGATCAGAAATGTTCCG  | A5g12580  | Promoter cloning primers to pPZP $\times$ omegal+ |
| RDS153      | CGCGATCCCTGTTTGTGTTTTTCTTCTTCTC     | At1g69920 | Promoter cloning primers to pPZP $\times$ omegal+ |
| RDS154      | CGCGATCCCTGGACTGAAGATTTGTGTTTGT     | At1g69920 | Promoter cloning primers to pPZP $\times$ omegal+ |
| RDS155      | CGCGATCCGCAATCGGAATCCTAAATCAG       | At1g17170 | Promoter cloning primers to pPZP $\times$ omegal+ |
| RDS156      | CGCGATCCGTTGCTTGTGATTAAGCTTCACTA    | At1g17170 | Promoter cloning primers to pPZP $\times$ omegal+ |
| DS244       | CCGTTTTTGGGCTCACTC                  | At1g69920 | AIGSTU12 RT-PCR                                   |
| DS245       | GGCAACGGTAGGCAATGTAA                | At1g69920 | AtGSTU12 RT-PCR                                   |
| DS246       | CAAAAAGGTGAATGTACGGC                | At1g17170 | AIGSTU24 RT-PCR                                   |
| DS247       | CAAAAGCAACAACAGATCAACATA            | At1g17170 | AIGSTU24 RT-PCR                                   |
| DS224       | GCGGCTTCTCTGAGTTTGTG                | AHg21990  | APR3 RT-PCR                                       |
| DS225       | CCGGGTGATGATCTTTCCT                 | AHg21990  | APR3 RT-PCR                                       |
| DS226       | TGGGACGTAACATACACTTTCAC             | At1g78000 | SULTRI:2 RT-PCR                                   |
| DS227       | AAGGCAAGGGGAGATATTC                 | At1g78000 | SULTRI:2 RT-PCR                                   |
| DS228       | TTCGCTTCTGGGATCAAAA                 | AHg04610  | APR1 RT-PCR                                       |
| DS229       | ACCGGAATCTCAGACCTTGT                | AHg04610  | APR1 RT-PCR                                       |
| DS230       | AAGCTTTTTCAGTATCATAGAGACA           | At1g62180 | APR2 RT-PCR                                       |
| DS231       | CTGGGTCAAAGACCTGTAC                 | At1g62180 | APR2 RT-PCR                                       |
| DSelfa-F    | TAGCCGCAAGACTCCTTTTCAGATTC          | A5g60390  | EF1- $\alpha$ RT-PCR                              |
| DSelfa-R    | GATGTCCTGGGGCATCAATGACT             | A5g60391  | EF1- $\alpha$ RT-PCR                              |

## Supplementary Information Legends

**Figure S1:** Visual phenotype of 20 day-old *nrc2* mutant plants grown in soil. Compared to Col-0 (WT), the *nrc2* mutants have pale yellow leaves. In contrast, the complemented T2 seedlings (GS-Comp1 to 3) have healthy green leaves similar to WT. This observation was made for six transformant lines.

**Table S1:** A list of the 30 genes most influenced by cadmium exposure ranked in order of decreasing induction. The entries highlighted represent the nine genes selected for promoter analysis in this study. Microarray data can be found at the Gene Omnibus (GEO) website, <http://www.ncbi.nlm.nih.gov/geo/>.

**Table S2:** A list of primers used for RT-PCR, promoter cloning, gene sequencing and complementation experiments.
